# Supplementary material for: Telephone cognitive behavioural therapy to prevent the development of chronic widespread pain: a qualitative study of patient perspectives and treatment acceptability
Source: PubMed Central journal article supplement (PMC6511117; doi:10.1186/s12891-019-2584-2), 2019-05-10

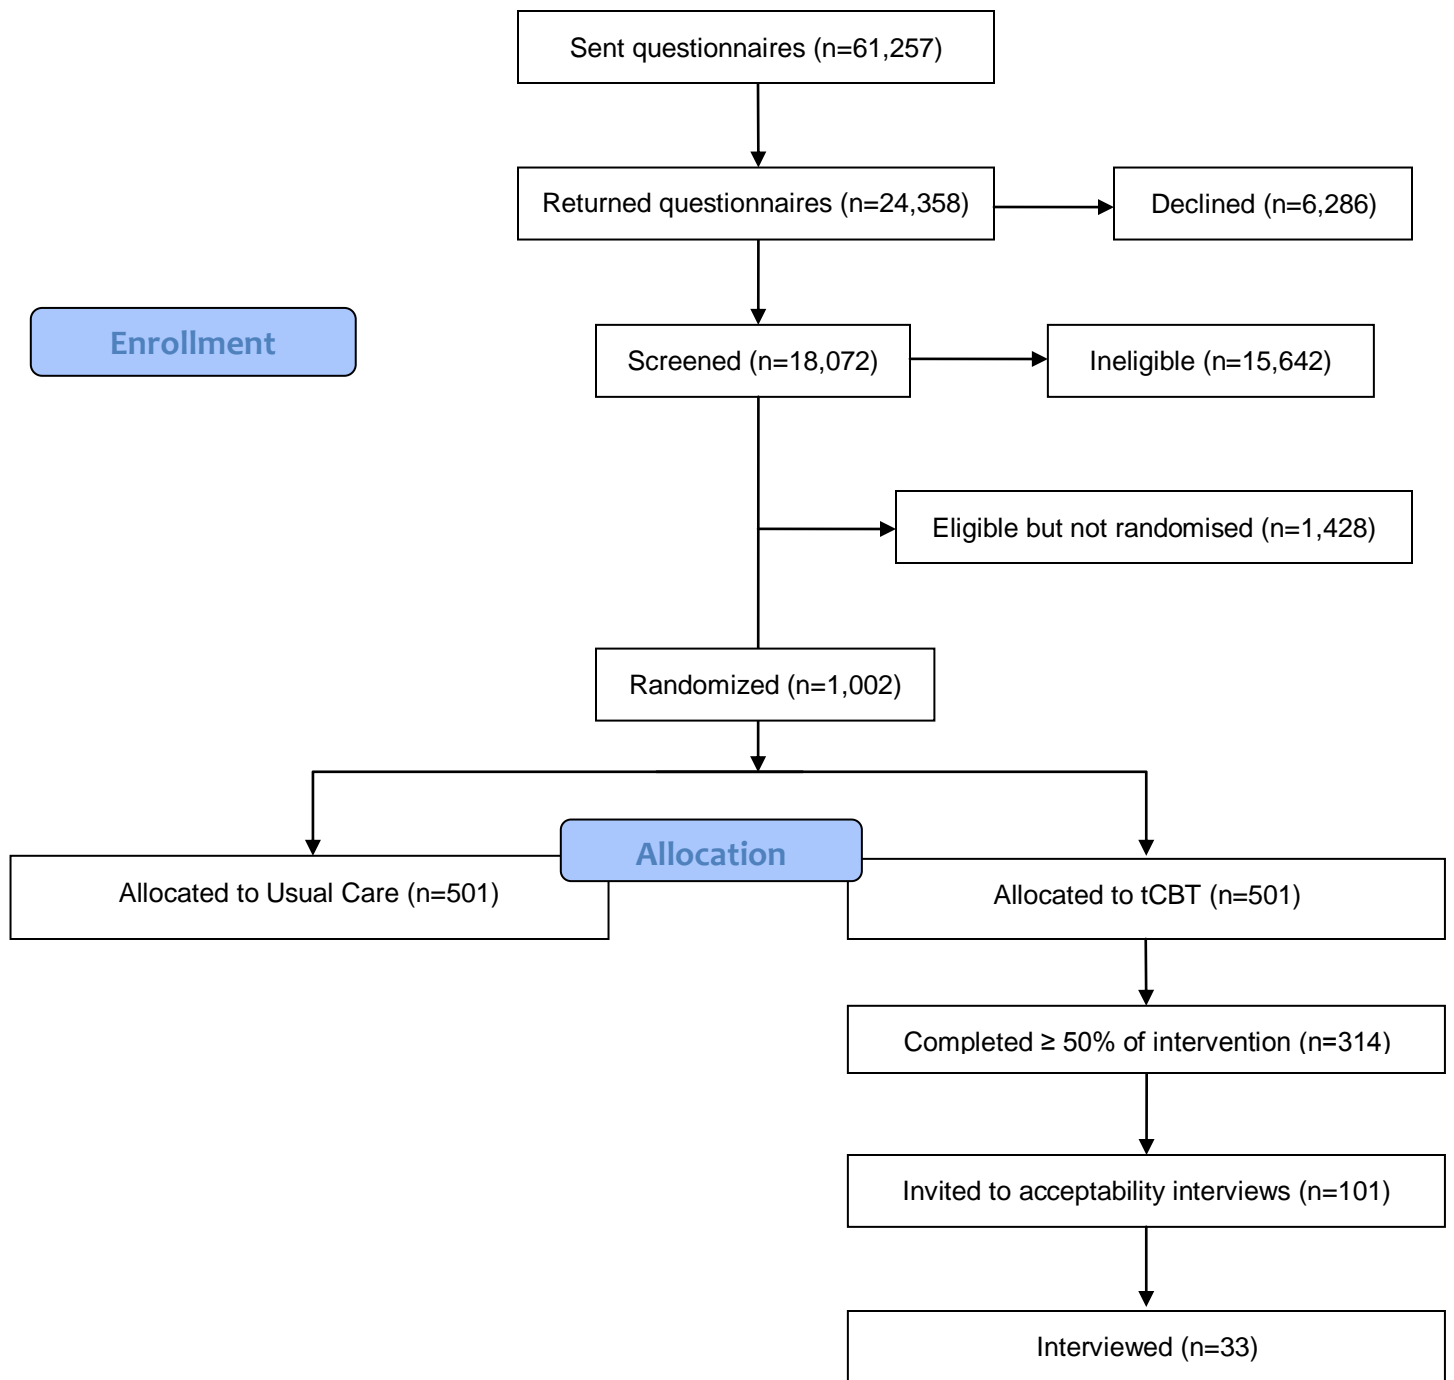

Supplement: 12891_2019_2584_MOESM1_ESM.pdf [file 12891_2019_2584_MOESM1_ESM.pdf]
