# Supplementary material for: Telephone cognitive behavioural therapy to prevent the development of chronic widespread pain: a qualitative study of patient perspectives and treatment acceptability
Source: PubMed Central journal article supplement (PMC6511117; doi:10.1186/s12891-019-2584-2), 2019-05-10
Supplement: 12891_2019_2584_MOESM3_ESM.pdf [file 12891_2019_2584_MOESM3_ESM.pdf]

# **MAMMOTH Acceptability study Theoretical Framework**

## **1.0 Presenting Issues and Pain Management**

- 1.1 Nature of the pain experienced
  - 1.1.1 Musculoskeletal
  - 1.1.2 Other health conditions
- 1.2 Pain management strategies
  - 1.2.1 Chronic pain
  - 1.2.2 Discomfort
  - 1.2.3 Minimisation
- 1.3 Help received prior to MAMMOTH
  - 1.3.1 Medical interventions
  - 1.3.2 Physical interventions
  - 1.3.3 Psychological interventions

## **2.0 Expectations & Reflections**

- 2.1 Trial perceptions and motivation to participate
  - 2.1.1 An alternative approach
  - 2.1.2 Altruism
  - 2.1.3 Pain relief
- 2.2 Initial expectations of intervention by phone
  - 2.2.1 Low expectations
  - 2.2.2 Open-minded
  - 2.2.3 High expectations
- 2.3 Post intervention reflections
  - 2.3.1 On treatment modality (phone)
  - 2.3.2 On the therapists
  - 2.3.3 On the manual

## **3.0 Intervention Impact & Acceptability**

- 3.1 Perceived impact: Post intervention changes
  - 3.1.1 Positive change recorded
  - 3.1.2 Impact on daily life
  - 3.1.3 No change recorded
- 3.2 Acceptability: What works
  - 3.2.1 Key elements of intervention success
  - 3.2.2 Acceptability: recommendation to others
  - 3.2.3 Sustaining changes over time
